## **Fatigue influences the recruitment, but not structure, of muscle synergies**

1 **Ortega-Auriol P.A.<sup>1\*</sup>, Besier T.F.<sup>2,3</sup>, Byblow W.D.<sup>1</sup>, McMorland A.J.C.<sup>1,2</sup>.**

2 <sup>1</sup>Movement Neuroscience Laboratory, Exercise Sciences, Faculty of Science, University of  
3 Auckland, Auckland, New Zealand

4 <sup>2</sup> Auckland Bioengineering Institute & <sup>3</sup> Department of Engineering Science, University of Auckland,  
5 Auckland, New Zealand

6 **\* Correspondence:**

7 Pablo Ortega-Auriol

8 p.ortegaauriol@auckland.ac.nz

9 **Keywords: muscle synergies, fatigue, electromyography, upper limb, non-negative matrix**  
10 **factorization, human motor control**

11 \* This article is written in British English.

12 Number of words: 4900

13 Figures and tables (combined): 8

14

## **Fatigue influences synergy recruitment**

15

### **16 Abstract**

17 The development of fatigue elicits multiple adaptations from the neuromuscular system. Muscle  
18 synergies are common patterns of neuromuscular activation that have been proposed as the building  
19 blocks of human movement. We wanted to identify possible adaptations of muscle synergies to the  
20 development of fatigue in the upper limb. Recent studies have reported that synergy structure remains  
21 invariant during the development of fatigue, but these studies did not examine isolated synergies. We  
22 propose a novel approach to characterize synergy adaptations to fatigue by taking advantage of the  
23 spatial tuning of synergies. This approach allows improved identification of changes to individual  
24 synergies that might otherwise be confounded by changing contributions of overlapping synergies.  
25 To analyse upper limb synergies we applied non-negative matrix factorization to 14 EMG signals  
26 from muscles of 11 participants performing isometric contractions. A preliminary multidirectional  
27 task was used to identify synergy directional tuning. A subsequent fatiguing task was designed to  
28 fatigue the participants in their synergies' preferred directions. Both tasks provided virtual reality  
29 feedback of the applied force direction and magnitude, and were performed at 40% of each  
30 participant's maximal voluntary force. Five epochs were analysed throughout the fatiguing task to  
31 identify progressive changes of EMG amplitude, median frequency, synergy structure, and activation  
32 coefficients. Three to four synergies were sufficient to account for the variability contained in the  
33 original data. Synergy structure was conserved with fatigue, but interestingly synergy activation  
34 coefficients decreased on average by 24.5% with fatigue development. EMG amplitude did not  
35 change systematically with fatigue, whereas EMG median frequency consistently decreased across  
36 all muscles. These results support the notion of a neuromuscular modular organization as the building  
37 blocks of human movement, with adaptations to synergy recruitment occurring with fatigue. When  
38 synergy tuning properties are considered, the reduction of activation of muscle synergies may be a  
39 reliable marker to identify fatigue.

### **40 1 Introduction**

41 Fatigue has major implications for motor behaviour and task performance, with adaptations to fatigue  
42 occurring at central and peripheral levels of the neuromuscular system (Gandevia, 2001). Muscle  
43 synergies, which depend on covariations between levels of muscle activation, have been proposed as  
44 stable building blocks of human movement (d'Avella et al., 2003), but how their structure and  
45 recruitment are affected by adaptation to fatigue has yet to be determined.

## Fatigue influences synergy recruitment

46 One definition of fatigue is a decrease in muscle force that will lead to task failure (Enoka and  
47 Duchateau, 2008). The neuromuscular manifestations of fatigue reflect central and peripheral  
48 adaptations which can be jointly quantified by EMG during sustained muscle contractions (Bigland-  
49 Ritchie et al., 1979). Fatigue-related changes in myoelectric properties involve decreases of muscle  
50 conduction velocity (Enoka and Duchateau, 2008) and frequency of discharge of motor units  
51 (Dideriksen et al., 2011). In the EMG signal, fatigue reliably produces a decrease of the mean frequency  
52 (Bigland-Ritchie et al., 1981; Merletti et al., 1991) but has a variable effect on amplitude depending on  
53 a number of factors including the specific muscle involved and the level of contraction (Gerdle et al.,  
54 2000).

55 Changes of patterns of activation across muscles have been proposed as a central strategy to reduce the  
56 effects of fatigue (Enoka et al., 2011; Enoka and Duchateau, 2008). Four adaptations to muscle  
57 activation patterns have been described: activity alternation across synergistic muscles for low level  
58 contractions ( $< 5\%$  MVC) (Kouzaki et al., 2002), co-activation with antagonists for moderate  
59 contractions ( $< 60\%$  MVC) (Levenez et al., 2005), contralateral muscle activation (Todd et al., 2003),  
60 and increased variability of activation within the task parameters (Baudry et al., 2007). Motor control  
61 theory is currently lacking a unifying principle that explains these different adaptations.

62 There is a growing body of evidence that the central nervous system (CNS) controls the muscular  
63 system using a low-dimensional structure, composed of modules known as muscle synergies. A muscle  
64 synergy is a fixed pattern of co-activation of muscles that are driven by a common time-varying signal  
65 called the activation coefficient. Muscle synergies may be a strategy of the CNS to deal with the  
66 problem of motor redundancy (d'Avella et al., 2003). Muscle synergies have been found to be  
67 consistent across different natural movements in human and animal models (Bizzi et al., 2008a; Cheung  
68 et al., 2005).

69 The effect of fatigue on muscle synergies is not fully understood. For muscle synergies to be the  
70 building blocks of motor control, they must remain intact and well-defined across many different states  
71 of the motor system, including in the presence of fatigue. The aim of our study was to identify the  
72 adaptations of muscle synergies during the development of fatigue. To support the notion of synergies  
73 as building blocks of movement, we hypothesize that synergy structure is conserved with the  
74 development of fatigue. Consequently, to explain the differences in muscle activations during fatigue,  
75 adaptations should occur in the activation coefficients of muscle synergies. We studied adaptations to

## Fatigue influences synergy recruitment

76 fatigue by comparing synergy structure and activation coefficients, as well as during the performance  
77 of fatiguing isometric upper limb contractions in humans.

## 78 2 Methods

### 79 2.1 Participants

80 We recruited eleven volunteer participants (**Table 1**); participants were young and healthy without  
81 any pathology that affected the upper limb, spine or posture. Volunteers were excluded if they  
82 reported neck, shoulder or arm pain (> 2 in a 1-10 verbal scale) within the last three months. The  
83 University of Auckland Human Participants Ethics Committee approved the research protocol and  
84 methods of the study (ref. 013218) and informed consent was gained prior to participation.

85 **Table 1:** Participant characteristics.

| ID     | Age  | Height (cm) | Weight (kg) | Arm Length (cm) | MVC force (N) |
|--------|------|-------------|-------------|-----------------|---------------|
| Mean   | 25.8 | 170.9       | 67.4        | 65.8            | 74.9          |
| Median | 23.0 | 170.0       | 63.9        | 66.0            | 74.3          |
| SD     | 4.7  | 7.9         | 12.9        | 4.6             | 22.1          |

86

### 87 2.2 Equipment

88 Forces generated by the participants were recorded at a handle instrumented with a 6-axis force-  
89 torque transducer (Omega160, ATI Industrial Automation, Apex, NC, USA) (**Figure 1.a**). Force was  
90 sampled at 120 Hz using custom software based on Dragonfly acquisition system (Pittsburgh).

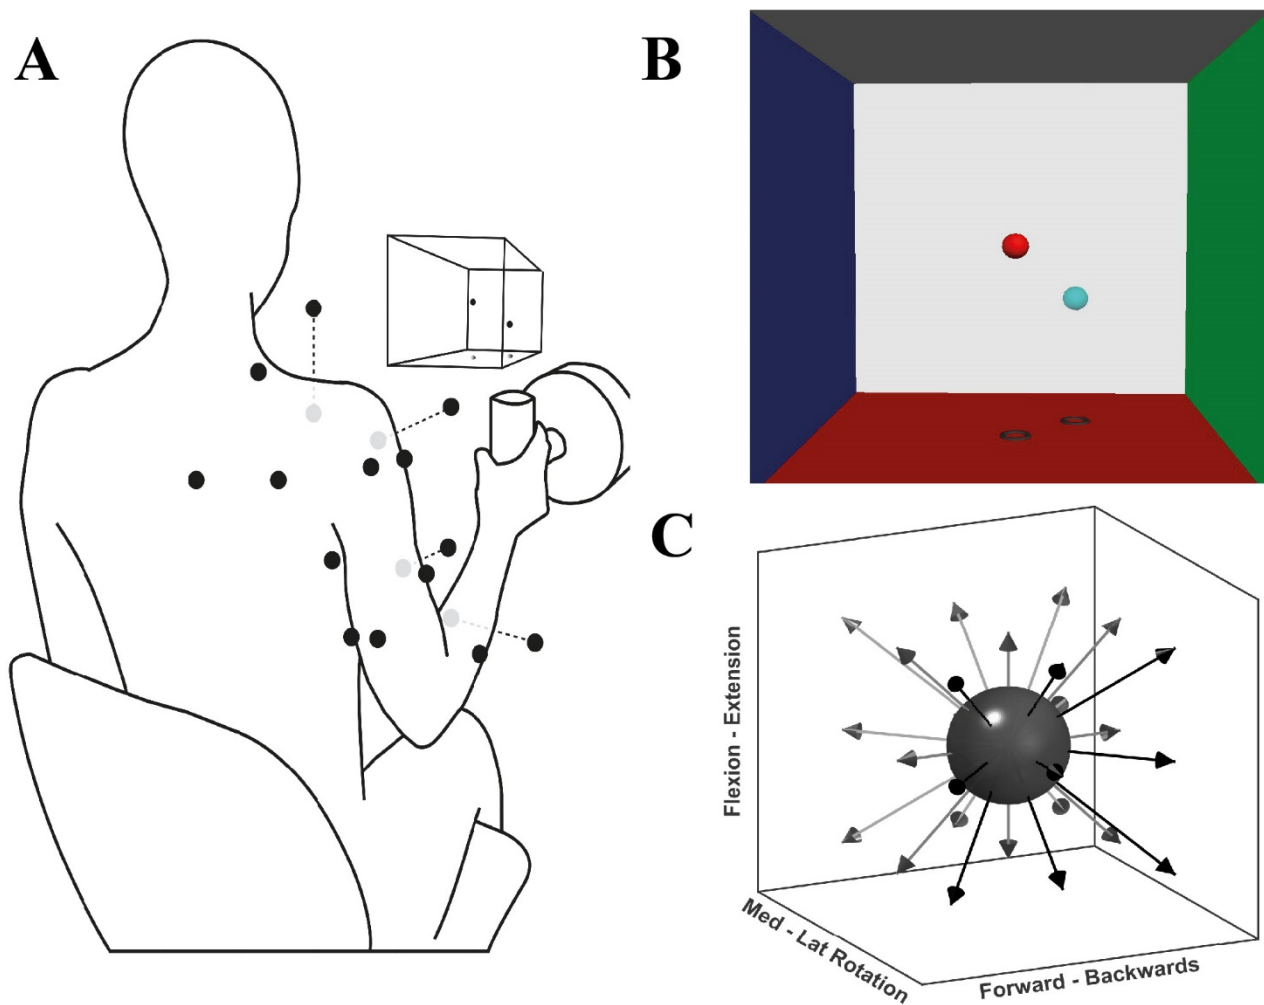

91

92 **Fig. 1:** Experimental setup for the multidirectional and fatiguing tasks. (A): Schematic illustration  
93 of EMG placement, VR feedback, and handle instrumented with a force transducer; black dots on  
94 the silhouette represents the EMG sensor placement, grey dots are sensors placed ventrally. (B)  
95 Screenshot of the VR feedback displayed on the screen in front of the participants, the centre of  
96 each VRF wall represents 100 N of applied force. (C) Schematic representation of the target  
97 directions during the multidirectional task.

98 Surface EMG signals were recorded with a wireless Trigno System (Delsys Inc., Boston, MA, USA).  
99 EMG activity was recorded from 14 major muscles of the shoulder, arm and forearm of the  
100 participant's dominant upper limb: superior (ST) and middle trapezius (MT), subscapular (Sb),  
101 serratus anterior (SA), anterior (AD), middle (MD) and posterior deltoid (PD), pectoralis major (PM,  
102 clavicular fibres), short (BS) and long (BL) head of biceps brachii, long (TL) and lateral (TLat) heads  
103 of triceps brachii, extensor carpi radialis (WE), and flexor carpi radialis (WF). These muscles were  
104 chosen for the likely large contribution to tasks' isometric contractions, as previously recommended  
105 to most accurately reconstruct synergies from a subset of muscles (Steele et al., 2013). Participants'

## Fatigue influences synergy recruitment

106 skin was prepared by rubbing a medical abrasive conductive paste (NuPrep, Weaver). Finally,  
107 electrode placement followed SENIAM and Cram's recommendation guidelines (Criswell, 2010;  
108 Hermens et al., 1999). EMG signals were sampled at 2000 Hz, via a custom software interface.

### 109 2.3 Protocol

110 Participants performed three tasks: maximal voluntary force (MVF), multidirectional trials, and  
111 fatiguing trials. Each task consisted of isometric contractions of different time lengths and directions.  
112 During the tasks, participants were seated on a stool and grasped the instrumented handle that was  
113 positioned in front of their shoulder, at a distance of 40% of their respective arm length (**Figure 1.a**).  
114 During the tasks, participants were instructed and encouraged to maintain their posture. To display  
115 the direction in which force had to be exerted, a custom virtual reality feedback (VRF) was  
116 developed (**Figure 1.b**). The VRF consisted of two spheres in a 3D force space: the position of one  
117 sphere dynamically displaying the users applied force, and a fixed sphere serving as directional target  
118 and force level cue. The movement of the former was proportional to the resultant force exerted at  
119 the handle by the participant. The position of the target sphere was the desired vector direction with a  
120 distance from the origin equivalent to 40% of the MVF. Initially, participants were trained on the use  
121 of the force transducer-VRF interface by practising target matching in random directions and forces.  
122 Participants were then asked to perform shoulder external rotation producing MVF while seated with  
123 the upper arm next to the trunk, and the elbow at 90° degrees. Three MVF trials of 3 s were recorded,  
124 and the average MVF was determined from the peak forces.

125 During the multidirectional task, participants executed isometric trials in 26 directions evenly  
126 distributed around a sphere (**Figure 1.c**). The goal of each trial was to match the movable sphere with  
127 the target one, applying a force of 40% of the MVF ( $\pm 7$  N.) for four seconds. If after three attempts  
128 of one minute, the participant was not able to achieve a continuous match of four seconds, the trial  
129 was considered a mistrial and excluded from further analysis. To prevent muscle fatigue a resting  
130 period of 20 s was given between trials.

131 For the fatiguing trials, participants were asked to perform one isometric contraction at 40% of the  
132 MVF until fatigue, for each of the significant synergies identified from the multidirectional task. The  
133 trials were performed in the preferred directions (PDs) of the extracted synergies. Synergy PDs are  
134 the directions for which a specific synergy shows the highest activation coefficient (see Data  
135 Analysis below). The CR10 Borg scale (Borg, 1998) was used to quantify the participant's self-

## **Fatigue influences synergy recruitment**

136 perceived exertion rate. The Borg scale is a subjective method to quantify fatigue development while  
137 performing a task. Participants reported their perceived exertion at the beginning of each trial and  
138 every one minute until fatigue was reached. Fatigue was reached when the force level dropped  $> 10$   
139 N for two consecutive seconds or when the participant declared it impossible to continue with the  
140 task, 10 on the Borg Scale. A rest period of 15 minutes was given between each fatiguing trial,  
141 allowing the muscles to return to an initial state.

### **142 2.4 Data Analysis**

143 Data were first averaged and trimmed to obtain stable activation patterns from whole trials of the  
144 directional task and from epochs within the fatiguing task. With the fatigue data, fatigue parameters  
145 and synergies were calculated from each epoch. A significant number of synergies was identified and  
146 extracted from the concatenated data of the multidirectional trials, or independently from each epoch  
147 of the fatiguing trials. Code used for synergy analysis is available at  
148 <https://github.com/ortegauiol/SynFAn>.

#### **149 2.4.1 EMG processing**

150 All data were analysed using custom scripts written in MATLAB 9.2 (MathWorks, Natick,  
151 MA, USA). EMG from the multidirectional trials were averaged for the intermediate two seconds of  
152 the target match period, obtaining a stable activation level. Fatiguing trials were trimmed and  
153 analysed in five epochs of 5% of the data, every 25% of the total trial time. Epochs were then  
154 rebinned into 100 data points. Signals were band-pass filtered (Butterworth, 2nd order, 5 - 400 Hz),  
155 demeaned, full-wave rectified, normalized by dividing all muscle activations by the maximum  
156 activation per trial (preserving the relative amplitude contribution of each muscle), converted to unit  
157 variance (Roh et al., 2012), and low-pass filtered again (Butterworth, 2nd order, 5 Hz) to obtain a  
158 signal envelope.

#### **159 2.4.2 EMG analysis**

160 Non-negative matrix factorization (NMF) analysis (Lee and Seung, 1999) was used to extract  
161 synergies. In simple mathematical terms, NMF can be modelled as  $D = W * C$ , where  $D$  is the original  
162 data set,  $W$  the synergy structure or modes, and  $C$  the activation coefficient. For the analysis, NMF  
163 was implemented using the multiplicative rule (Berry et al., 2007), where each iteration gave a  
164 different  $W$  and  $C$  estimate, converging from the previous solution. The final solution was

## Fatigue influences synergy recruitment

165 implemented as the result of 20 consecutive iterations with a difference of less than 0.01% among  
166 them (Roh et al., 2015).

167 Synergy analysis requires a pre-defined number of synergies. Therefore, to find an adequate solution,  
168 we iterated the number of synergies from one until 13 (number of muscles minus one). The concept  
169 behind muscle synergies is that a reduced dimensionality, or number of synergies in this case, is able  
170 to reconstruct complex higher dimensional behaviour. To determine a significant solution or number  
171 of synergies, the quality of the solution must be compared with the original data. We used the  
172 variance accounted for (VAF) metric to make this comparison (Cheung et al., 2005). VAF is defined  
173 in global (whole data set) and local (individual channels) scales. VAF was defined according to  
174 equation 1:

175 **Equation 1:** 
$$VAF = 1 - \frac{(ODS-RD)^2}{ODS^2}$$

176 For global criteria, *ODS* represents the variance of the original data set, and *RD* the variance of the  
177 reconstructed data set. The local criterion of VAF is applied to each muscle independently: this  
178 involves replacing *ODS* with the variance of data from a single channel, and *RD* is replaced by the  
179 variance of the same reconstructed channel. The significant number of synergies was selected when  
180 global VAF => 90% and local VAF=>80%.

181 Once a significant number of synergies was determined, the PD of each synergy from the  
182 multidirectional task was calculated as the average of each trial's direction vector scaled by the  
183 activation coefficient of that synergy during that trial (equation 2).

184 **Equation 2:** 
$$\overrightarrow{PD}_r = \frac{\sum_i(Q_i * C_{ri})}{T}$$

185 Where  $Q_i$  is the direction unit vector of the  $i$ th trial,  $C_{ri}$  is the activation coefficient of the  $r$ th synergy  
186 of the  $i$ th trial, and  $T$  is the total number of trials.

### 187 2.4.3 Synergy clustering

188 To group similar synergies across participants in each epoch of the fatiguing task, synergies from all  
189 participants were pooled. Cluster analysis was applied to the pooled synergies using the K-medoids  
190 algorithm (Park and Jun, 2009), using the cosine function as the distance metric across clusters, and  
191 the Silhouette index (Kaufman and Rousseeuw, 1990) to determine the correct number of clusters.  
192 Then, a mean synergy set per epoch was calculated by averaging each cluster. A second 'sorting'



## **Fatigue influences synergy recruitment**

193 cluster analysis across epochs was applied to the calculated mean synergy sets to match similar mean  
194 synergies across epochs.

195 To test our first hypothesis that synergy structure is conserved with the development of fatigue,  
196 structure was compared across epochs by calculating the scalar product between synergies. Two  
197 synergies were defined as similar when the scalar product value was above the 95th percentile of a  
198 distribution of scalar products generated by comparing unstructured synergies. Given that synergy  
199 weights are constrained to have positive values between zero and one (normalized), there is a chance  
200 for spurious similarities. Using a threshold value from a by-chance distribution of scalar products  
201 (Roh et al. 2013) reduces the possibility of false positive similarity. To create shuffled unstructured  
202 synergies, we pooled all synergy structures from the fatiguing trials, and randomly shuffled weight  
203 values across epochs and muscles. Then, we calculated the scalar product between all shuffled  
204 synergies to obtain a baseline by-chance similarity distribution of scalar products.

### **205 2.4.4 Fatigue parameters**

206 EMG adaptations to fatigue were analysed for the muscles with the highest weight within each of the  
207 three synergy clusters: MT, AD, and ST. In theory, these muscles have a higher contribution to the  
208 performed contraction. This signal processing scheme allowed us to compare EMG amplitude,  
209 frequency, synergy structure, and activation coefficients along the development of fatigue. Fatigue  
210 parameters of power spectrum median frequency and signal amplitude of each epoch from the  
211 fatiguing trials were calculated by the Welch method (Welch, 1967) and RMS analysis respectively.  
212 All parameters were normalized to their value in the first epoch.

213 Separate one-way repeated measures ANOVAs were conducted with the dependent measures being  
214 the synergy activation coefficients and fatigue parameters (amplitude and median frequency) and the  
215 independent measure being the fatigue epoch. For each ANOVA, if significant differences were  
216 found, Bonferroni corrected paired t-tests were used to identify specific differences between epochs.  
217 Finally, to determine the trend of changes across epochs, a Pearson's correlation analysis was used to  
218 describe the relationship between synergy coefficients and fatigue parameters from the muscles with  
219 the highest weight in each synergy. Statistics were performed using SPSS (version 24, IBM, NY).

## **220 3 Results**

## Fatigue influences synergy recruitment

221 Representative raw and processed EMGs from a single subject during the multidirectional and  
222 fatiguing trials are displayed in **Figure 2**. All participants completed the multidirectional and  
223 fatiguing trials without missing any targets. For all participants, VAF analysis identified that three to  
224 four synergies (mean (SD) = 3.6 (0.5)) were sufficient to reconstruct the original muscle activation  
225 dataset from multidirectional trials.

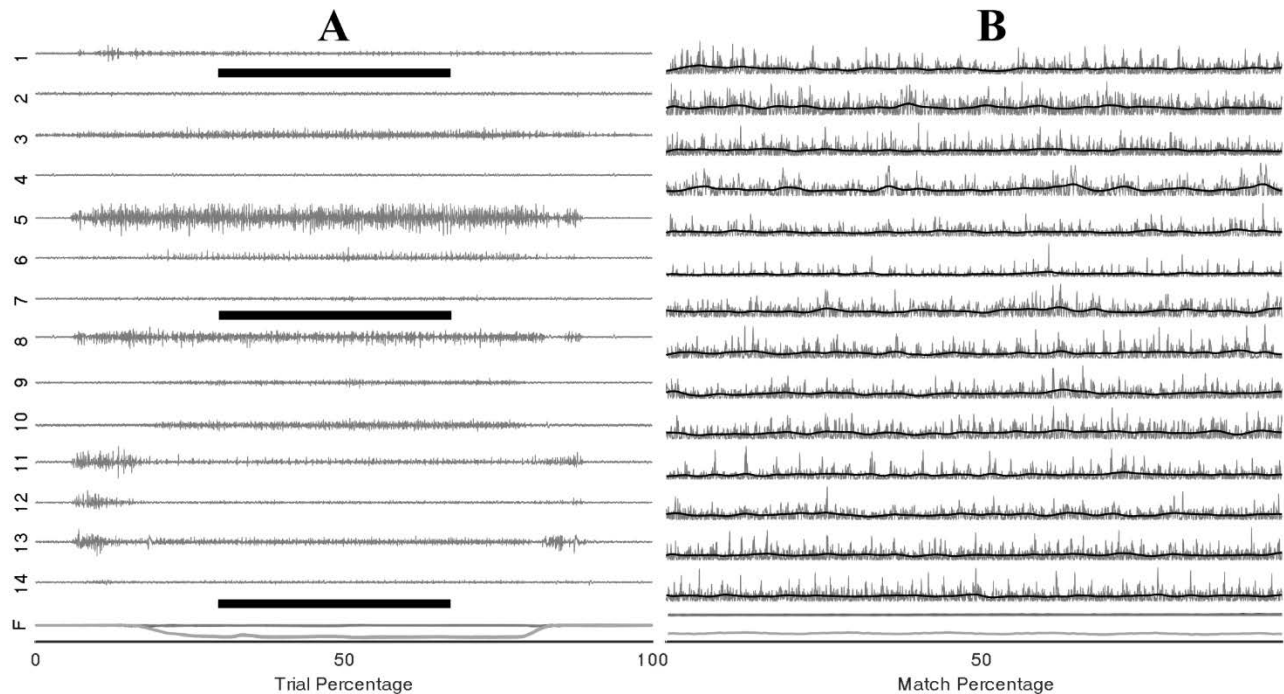

226

227 **Fig. 2:** Example EMG and force traces from a single trial of the multidirectional task. (A): Raw  
228 EMG signals of the 14 recorded muscles (1-14) and components of force vector (F) during a  
229 complete trial, black bars represent the period shown in (B): EMG and force traces trimmed to  
230 the central two seconds of the target-match period of the multidirectional task (grey); rectified  
231 and low-pass filtered signal (black).

### 232 3.1 Fatigue parameters

233 Changes of EMG median frequency, amplitude, and synergy activation coefficients were compared  
234 across epochs for each individual synergy. EMG median frequency (**Table 2**) changed in some but  
235 not all muscles with the development of fatigue. For MT median frequency: Maulchy's test indicated  
236 that the assumption of sphericity was violated across the different epochs  $\chi^2(9) = 86.4, p = 0.001$ ,  
237 therefore Greenhouse-Geisser correction is reported ( $\epsilon = 0.45$ ). The results indicate that median  
238 frequency was different across epochs for MT ( $F[1.8, 70.6] = 3.92, p = 0.028, \omega^2 = 0.009$ ). However,  
239 a post-hoc analysis did not find significance between the first and fifth epoch (highest mean

## Fatigue influences synergy recruitment

240 difference 8%, Bonferroni-corrected paired t-test  $p = 0.15$ ). For AD median frequency, again  
 241 sphericity was violated ( $\chi^2 (9) = 85.9$ ,  $p = 0.001$ ) and a Greenhouse-Geisser correction of  $\epsilon = 0.45$   
 242 was used. Results suggest that there is no difference for the AD with the development of fatigue  
 243 ( $F[1.8, 70.8] = 2.1$ ,  $p = 0.13$ ,  $\omega^2 = 0.005$ ). Finally, for ST sphericity was violated [ $9] = 27.3$ ,  
 244  $p = 0.001$ ), with a Greenhouse-Geisser correction of  $\epsilon = 0.75$ . ANOVA suggest that median  
 245 frequency decreased with the development of fatigue for the ST ( $F [3, 116.5] = 28.264$ ,  $p = 0.001$ ,  
 246  $\omega^2 = 0.005$ ). Post-hoc analysis found multiple differences ( $p < 0.05$ ). These differences were  
 247 between the 1<sup>st</sup> and all other epochs ( $p = 0.001$  for all), and between epochs 2-4, 2-5, and 4-5, ( $p =$   
 248  $0.001$  for all). Fatigue development produced changes of parameters in some of the major  
 249 contributors within synergies (**Figure 3**).

250 **Table 2:** Extracted fatigue parameters and synergy activation coefficients (mean (SD)) values. EMG  
 251 amplitude and frequency is present as the average of the MT, AD, and ST muscles.

| Epoch                 | II          | III         | IV          | V           |
|-----------------------|-------------|-------------|-------------|-------------|
| EMG amplitude         | 100.6 (4.6) | 99.9 (7.5)  | 97.3 (11.1) | 84.7 (14.8) |
| EMG median frequency  | 95.7 (1.8)  | 94.8(2.7)   | 91.9(2.6)   | 90.2 (2.9)  |
| External rot. synergy | 97.1 (8.3)  | 95.1 (5.5)  | 94.1 (9.9)  | 68.6 (10.1) |
| Flexion synergy       | 91.9 (12.2) | 97.8 (11.7) | 82.7(18.7)  | 80.5(13.2)  |
| Extension synergy     | 97.4 (11.3) | 92.8 (11.4) | 94.0 (10.3) | 77.4 (12.4) |

252

## Fatigue influences synergy recruitment

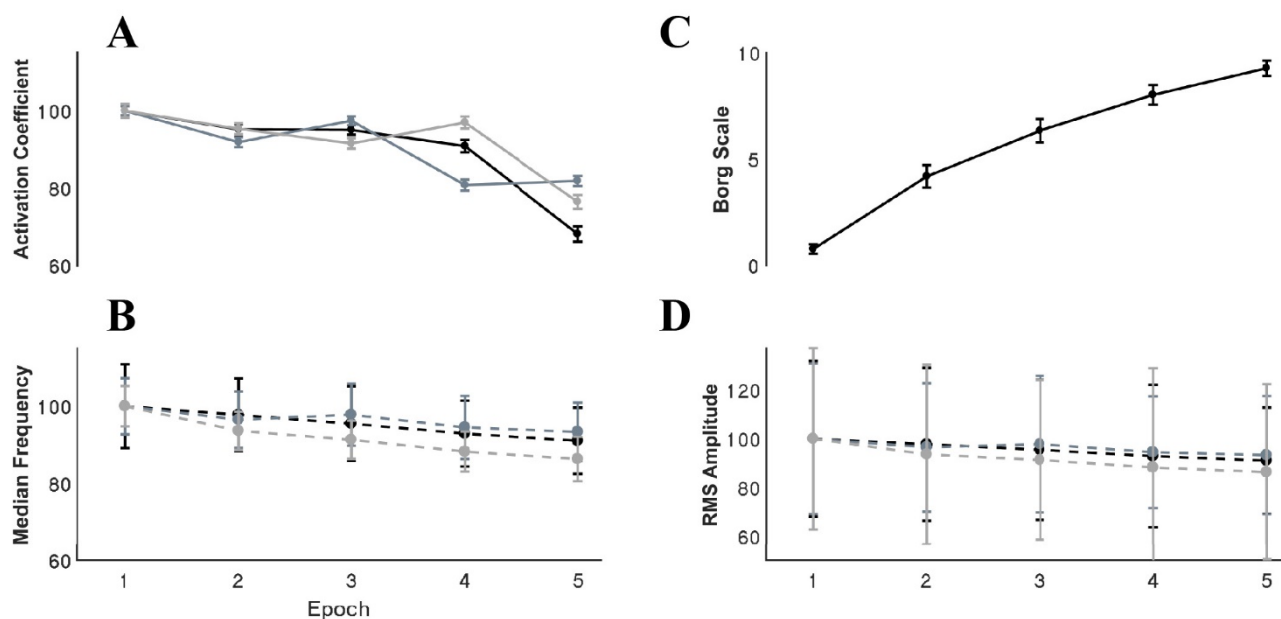

253

254 **Fig. 3:** Activation coefficients and fatigue parameters through the development of fatigue. Error bars  
 255 show the 95% confidence interval. For the activation coefficient panel, black, grey and light grey  
 256 traces represent internal rotation, flexion and extension synergies respectively. For the EMG  
 257 parameters the black, grey and light grey traces represents the MT, AD, and ST muscles respectively

258 Signal RMS (**Table 2**) changed with the development of fatigue only for the MT muscle. Sphericity  
 259 was violated ( $\chi^2[9] = 36.6, p = 0.001$ ), consequently Greenhouse-Geisser correction was used  
 260 ( $\epsilon = 0.68$ ). ANOVA reported a decrease of the amplitude in time with the development of fatigue  
 261 ( $F[2.7, 105.9] = 10.2, p = 0.001, \omega^2 = 0.0015$ ). Bonferroni-corrected t-test post-hoc analysis revealed  
 262 several significant decreases of the Trapezius muscle with fatigue (epochs: 1-5 ( $p = 0.001$ ), and 2-5  
 263 ( $p = 0.003$ )) (**Figure 3**).

### 264 3.2 Synergies modulation

265 Synergies showed a distinctive tuning or modulation associated with direction of exertion: activation  
 266 coefficients were highest for one particular direction, its preferred direction (PD), and decreased as  
 267 the angle between the direction of exertion and the PD increased (**Figure 4a**). After extracting  
 268 synergies from the pooled fatiguing trials, cluster analysis identified four different clusters (**Figure**  
 269 **4b**). The PDs of these synergies were distributed approximately evenly throughout space. The  
 270 predominant movement and muscle of these clusters were: external rotation (MT), flexion (AD),  
 271 extension (ST), and internal rotation (PM). The second cluster analysis grouped synergies in three

## Fatigue influences synergy recruitment

272 clusters per epoch, suggesting that synergies representing internal rotation became reclassified into  
273 the flexion and extension clusters.

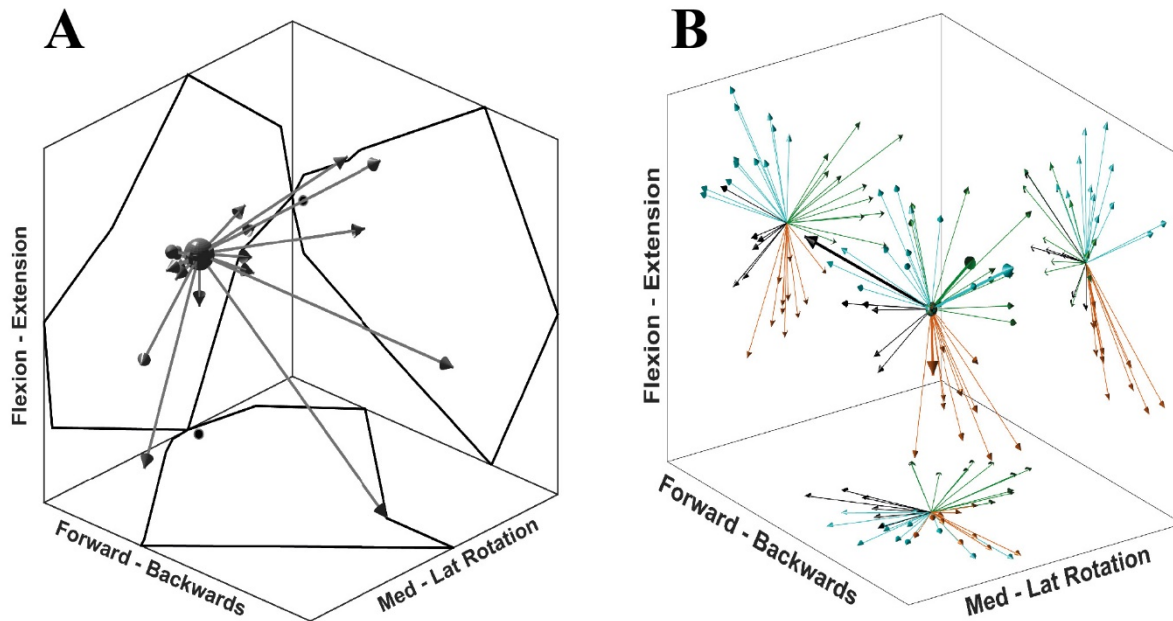

274

275 **Fig. 4:** Synergy directional tuning and preferred directions. (A) A single synergy tuning over 26  
276 directions of the multidirectional task. Each arrow represents a single target direction, and the  
277 length of the arrows is scaled to the synergy activation coefficient. The outline reflected on the  
278 graph walls displays the outer reach of the arrows, black dots on walls indicate the (0,0)  
279 coordinate. (B) 3D display of synergy PD for each synergy of all participants. Graph walls  
280 display a 2D projection of synergy directions showing the cluster distribution. Each colour  
281 represents a cluster identified from the first cluster analysis. Thicker arrows on the 3D display  
282 identify the synergies from a single, randomly-chosen participant.

### 283 3.3 Synergy structure

284 In agreement with our first hypothesis, synergy structure was conserved with the development of  
285 fatigue (**Figure 5**). Conservation of synergy structure was reflected by the high values of the scalar  
286 products between instances of an individual synergy across different epochs. Conservation of  
287 structure was analysed within each of the three mean synergy clusters derived from the sorting cluster  
288 analysis. Within each cluster, the mean scalar product was: S1 mean 0.98 (SD 0.009), S2 0.99  
289 (0.007), and S3 0.97 (0.02). Finally, a paired t-test analysis revealed that the similarity within the  
290 synergy clusters was different from the similarity within a shuffled synergy group ( $T[59] = 23.6$ ,  $p =$   
291  $0.001$ , representing a large effect size  $\eta^2 = 0.90$ ). This suggests that the similarity within synergy  
292 clusters is higher than would be expected by chance.

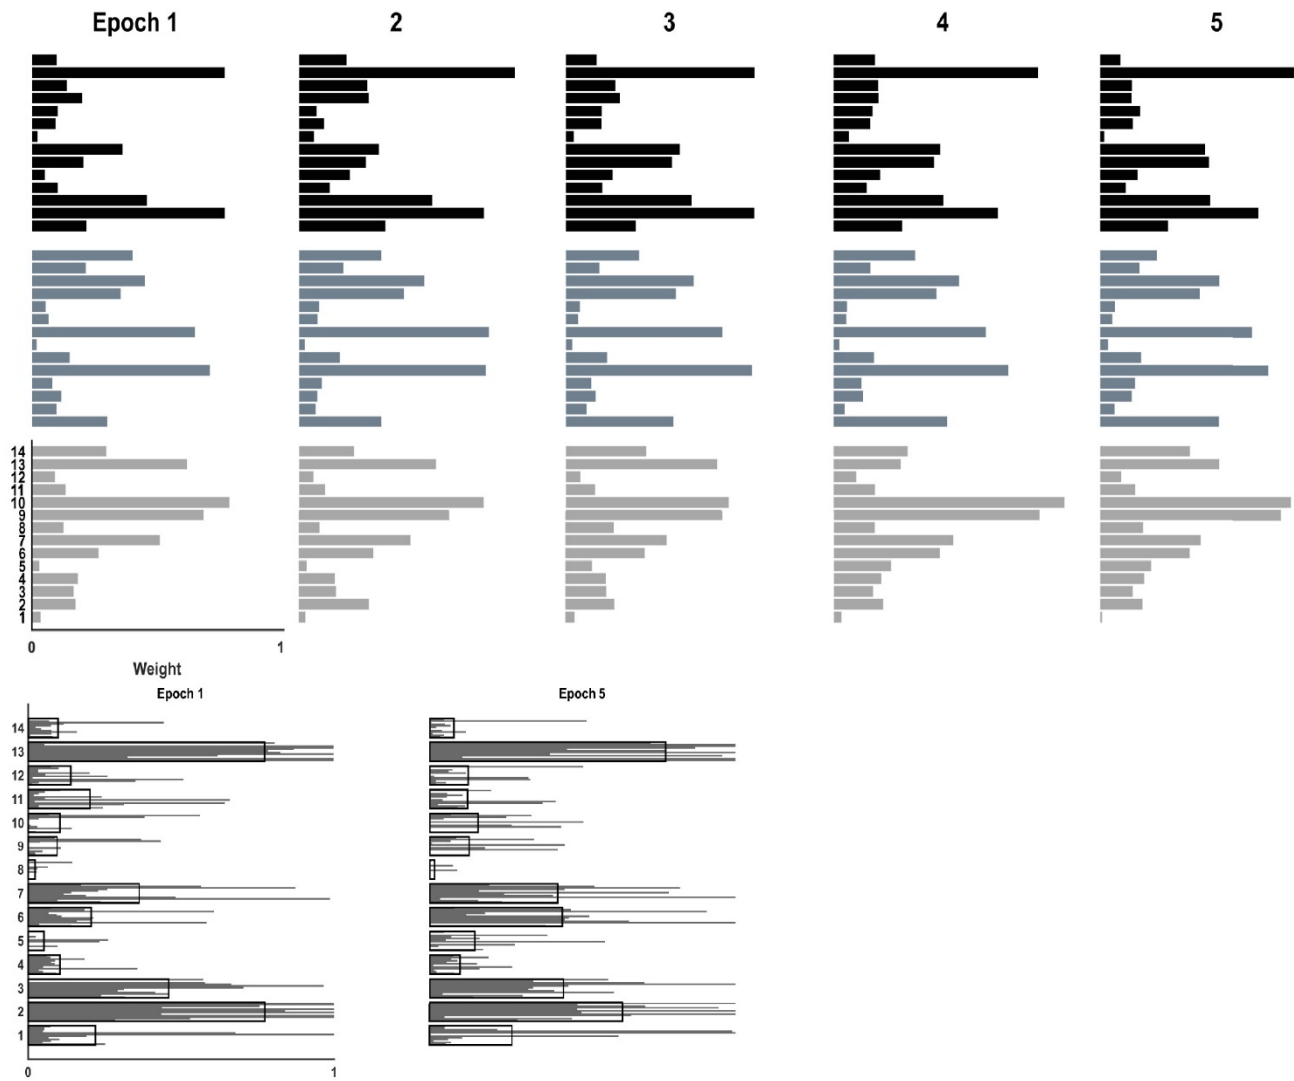

293

294 **Fig. 5:** Synergy structure (weights) through the development of fatigue of the three identified  
295 synergies: internal rotation (black), flexion (grey), and extension (light grey). **(A)** The structure of  
296 the three synergies was conserved with the development of fatigue. **(B)** Variability of the  
297 structure of a single synergy, comparing the first and fifth epoch. Grey bars show the contribution  
298 of each muscle to the synergy identified in a single participant. Black-bordered bars indicate  
299 mean weights of the synergy cluster across all participants, which have been used for  
300 comparisons across epochs. The ordering of the subjects grey bars is the same for each muscle.

### 301 **3.4 Synergy activation coefficients**

302 Synergy activation coefficients decreased with the development of fatigue (**Table 2, Figure 4**). S1  
303 analysis showed a conserved sphericity ( $\chi^2$  [9] = 13.6,  $p = 0.15$ ). S1 activation coefficient showed a  
304 decrease with the development of fatigue ( $F[4, 40] = 4.2$ ,  $p = 0.006$ ,  $\omega^2 = 0.001$ ). Post-hoc analysis  
305 revealed differences ranging between 3-31%; these were significant between epochs: 1-5 ( $p = 0.005$ ),

## Fatigue influences synergy recruitment

306 2-5 ( $p = 0.05$ ), 3-5 ( $p = 0.04$ ). The mean S2 activation coefficient had a minor decrease of 18% of the  
307 normalized coefficient value between the first and fifth epoch ( $p = 0.22$ ). Finally, S3 showed an even  
308 smaller decrease of 13% of its coefficient of activation.

309 To further explore the causes of the changes in activation coefficient while conserving synergy  
310 structure in terms of the relative changes to individual muscles, we examined the changes of EMG  
311 median frequency and amplitude in different muscles across epochs. We calculated the correlation  
312 coefficients of these parameters in two ways. Firstly, we compared the values from all muscles, and  
313 secondly, we focused on a muscle with the highest weight and another muscle randomly selected  
314 from those with an intermediate weight between 0.6 and 0.4. We did not examine a muscle with a  
315 low contribution to each synergy because we would expect the amplitude, and therefore signal-to-  
316 noise ratio, of their EMG signals to be low. When all the muscles were considered, the change of  
317 median frequency correlation was high ( $r = 0.95$  (0.04)), suggesting that the median frequency of all  
318 muscles decreased with a similar trend regardless of the level of involvement of the muscle in the  
319 task. On the other hand, EMG amplitude correlation changes were moderate ( $r = 0.43$  (0.4)). When  
320 looking at a high and medium contributor muscle to each synergy, the median frequency correlation  
321 average of the three synergies was high ( $r = 0.77$  (0.08)), and signal amplitude correlation was low  
322 ( $r = 0.3$  (0.5)).

323 Finally, to characterize the behaviour of synergy activation coefficients as a possible predictor of  
324 fatigue, correlation coefficients were calculated between synergy activation coefficients, fatigue  
325 parameters of the muscles, and Borg scale (**Figure 4**) with the highest weight of the correspondent  
326 synergy (**Table 3**). Activation coefficients were correlated with mean frequency (all  $r > 0.7$ ) and  
327 RPE (all  $< -0.7$ ), while correlations with amplitude were inconsistent ( $r = 0.94 - 0.05$ ).

328 **Table 3:** Correlation between synergy activation coefficients and other fatigue adaptation parameters.

| Synergy /Muscle | External rot. / MT | Flexion / AD | Extension / ST |
|-----------------|--------------------|--------------|----------------|
| Amplitude       | 0.943              | 0.498        | 0.614          |
| Frequency       | 0.838              | 0.957        | 0.708          |
| RPE             | -0.771             | -0.829       | -0.715         |

329

## 330 4 Discussion

331 Muscle synergies are proposed as the building blocks of human movement (Bizzi et al., 2008b). To  
332 fulfil this role, synergy structure should remain fixed, or at least known, by the intact central nervous  
333 system. The development of fatigue produces adaptations at central and peripheral levels of the  
334 neuromuscular system, which implies that synergy structure could change if counteracting  
335 adaptations did not exist. We hypothesize that synergy structure would be conserved with the  
336 development of fatigue, which would support the notion of synergies as fundamental units of motor  
337 control. It is important to note that fatigue induces adaptations in amplitude and frequency of the  
338 EMG signal, not only of the actuator muscles but also antagonists (Enoka and Duchateau, 2008). If  
339 synergies are purely the result of biomechanical constraints (Valero-Cuevas et al., 2009), changes in  
340 the signal amplitude across muscles would reflect changes in synergy structure.

341  
342 In support of our hypothesis, we found that, with the development of fatigue demonstrated by the  
343 decrease of the median frequency and changes in amplitude of the signal, remarkably, synergy  
344 structure remains intact. However, synergy activation coefficients consistently decrease with the  
345 development of fatigue. This decrease correlates with characteristic adaptations found in the spectral  
346 analysis of the EMG signal, suggesting common mechanisms of regulation.

347  
348 Adaptations to fatigue occur along the neuromuscular path from cortex to muscle, including changes  
349 at muscle, spinal, and cortical levels (Gandevia, 2001). During an isometric contraction, modulation  
350 of motoneuron activity is mediated by afferent inputs from peripheral receptors: muscle spindles  
351 (Macefield et al., 1993), Golgi tendon organs, and small diameter afferents (III and IV) (Hayward et  
352 al., 1991). Afferent input is partially responsible for the progressive decrease of the firing rate of  
353 motor units (Garland et al., 1988; Macefield et al., 1993; Vallbo, 1974) by inhibition, reducing  
354 facilitation, and presynaptic modulation (Gandevia, 2001). These peripheral afferents further  
355 decrease central drive that may itself be diminished with sustained contractions (Gandevia et al.,  
356 1996).

357  
358 It is possible that synergies are generated and recruited at a central level with influence from the  
359 periphery. The outcome of these interacting adaptations to fatigue is a modification of muscle  
360 activation. In different muscles, we found that EMG amplitudes increased, decreased, or remained  
361 constant with fatigue. Remarkably, even in the presence of these uncorrelated changes of the EMG



## Fatigue influences synergy recruitment

362 amplitude, synergy structure remained invariant. Similar behaviour is found in animal models;  
363 deafferentation results in drastic changes of EMG amplitude which can be explained by invariant  
364 synergy structure and only changing activation coefficients (Cheung et al., 2005). Our results support  
365 their notion of a feedback mechanism able to influence muscle synergy recruitment without changing  
366 the underlying structure. Synergy structure is also conserved across different natural movements of  
367 animals (Cheung et al., 2005) and humans (d'Avella et al., 2003). Therefore, the apparent universal  
368 conservation of synergy structure is consistent with this structure resulting from an underlying  
369 neuroanatomical circuitry at spinal or supra-spinal levels (Bizzi et al., 2008b), and the notion of hard,  
370 robustly encoded synergies from central sites.

371  
372 To understand the intricate interactions that would influence synergy recruitment but conserve  
373 structure in the presence of fatigue, we need to consider the relationships between the known central  
374 and peripheral mechanisms of fatigue adaptation. Central fatigue is defined as the decrease of  
375 efferent drive from central sites, modulated by the influence of peripheral afferents (Gandevia, 2001).  
376 Experimentally, this can be demonstrated by an extra force output evoked by twitch interpolation  
377 (Allen et al., 1995; Bülow et al., 1995) or transcranial magnetic stimulation (Gandevia et al., 1996)  
378 that increases with fatigue. Similarly, synergy activation coefficients have been proposed as the  
379 reflection of central drive (Bizzi et al., 2008b; d'Avella et al., 2006). The decline of the synergy  
380 activation coefficients resembles that of central fatigue. Deafferentation of animal models produce  
381 changes of synergy recruitment (Cheung et al., 2005). Consequently, our findings of a decrease of  
382 synergy activation coefficients support the concept of an interaction among motor drive, spinal  
383 circuitry and afferent inputs (McCrea, 2001), integrating the proposed mechanisms of both fatigue  
384 and synergies. Afferent feedback influences the decrease of the muscle median frequency as an  
385 adaptation to fatigue and the strong correlation with synergy activation coefficients suggests a  
386 common modulatory mechanism.

387  
388 The number of synergies, and more importantly, their structure, varies depending on the set of  
389 specific muscles included (Steele et al., 2013). To alleviate this effect it is important to include as  
390 many muscles as possible, in particular those that will contribute greatly to the task. Given the  
391 technical impossibility of acquiring all muscles of the upper limb, some structural differences from  
392 synergies that consider all muscles might underlie our results. Nevertheless, we included 14 muscles,  
393 mainly of the shoulder region, considering their probable muscle contribution to isometric

## Fatigue influences synergy recruitment

394 contractions. Brachioradialis is one deeper muscle that would potentially make a significant  
395 contribution to synergy structure that is not easily recorded from using surface EMG. Another  
396 concern with the estimation of synergies is that the extracted number of synergies depends critically  
397 on the complexity of the task. Dynamic contractions utilize a higher number of synergies (Cheung et  
398 al., 2005, 2009; d'Avella et al., 2006) than less complex behaviour like isometric contractions. The  
399 amount of explored space is also relevant for the number of synergies, and it seems that this effect  
400 can outweigh the increase in number of synergies arising from more complex movement: from two  
401 synergies in dynamic exploration of a single plane (Muceli et al., 2010) to six synergies for  
402 movements in multiple planes and directions (Cheung et al., 2009). We found that three to four  
403 synergies were able to reconstruct the original EMG sets from the multidirectional trials. This  
404 number is similar to other studies (Roh et al., 2012, 2013; Steele et al., 2013) that have performed  
405 isometric contractions with two to four times the number of directions considered in our  
406 multidirectional task. Our task was more constrained in terms of force directions because our aim  
407 was not to find all available synergies. Nevertheless, we did likely obtain most synergies involved in  
408 performing isometric contractions with the upper limb.

409  
410 Synergies seem to be a more reliable measure of fatigue development, highly correlated with  
411 parameters that have shown homogeneous changes with fatigue development. Synergy analysis  
412 implies the search for spatiotemporal patterns of muscle activity (McMorland et al., 2015),  
413 considering signal amplitude a key element of analysis. Our results show mixed changes of the EMG  
414 signal amplitudes within a specific synergy, corroborated by a moderate correlation between  
415 amplitude changes. Within EMG adaptations to fatigue, signal amplitude behaves inconsistently (De  
416 Luca, 1984; Dimitrova and Dimitrov, 2003; Gerdle et al., 2000), therefore it remains an unreliable  
417 measure of fatigue (Hultman and Sjöholm, 1983; Vøllestad, 1997). It is relevant to consider that a  
418 decline in force with fatigue does not directly imply a decline of the EMG amplitude (Merton, 1954).  
419 Thus, synergy activation coefficients seem like a better alternative to EMG amplitude although they  
420 require a slightly more elaborate analysis. In contrast, EMG spectral median frequency shows a  
421 consistent decrease with the development of fatigue (Bigland-Ritchie et al., 1981). Our results show  
422 an equivalent behaviour across all muscles, with a high correlation within a single synergy. However,  
423 this decrease shows certain variability across muscles and, once normalized, is not as great as the  
424 decrease of the synergy activation coefficients. EMG power spectrum is a compound characteristic  
425 affected by the intracellular action potential, motor unit potential, and consequently from motor drive  
426 and efferent signals (Dimitrova and Dimitrov, 2003). Synergy analysis looks at the modular control

## **Fatigue influences synergy recruitment**

427 of fixed activation patterns of many muscles, thus it is likely that fewer relevant variables affect its  
428 behaviour. Although synergy analysis does not directly consider the EMG power spectrum, the  
429 correlation between EMG median frequency and synergy activation coefficients may reflect shared  
430 regulatory mechanisms.

431

432 Our experimental setup presents several advantages over other attempts to characterize synergy  
433 adaptations to fatigue (Smale et al., 2016; Turpin et al., 2011). First, by performing the fatiguing  
434 trials in the directions of synergy PDs, we have isolated the effects of fatigue to a single synergy at a  
435 time. This approach restricts confounding effects associated with load sharing across synergies, and  
436 maximizes the extent to which fatigue influences only the components relating to activation of the  
437 single synergy in question. Unspecific fatigue development of synergies, as seen previously in  
438 studies examining functional movements, may lead to wrong interpretations of outcomes and the  
439 underlying mechanisms. Secondly, we analysed adaptations to fatigue across multiple epochs,  
440 improving the opportunity to quantify changes throughout the development of fatigue. We see this as  
441 an improvement of the analysis of global measures during fatigue development. Analysis only  
442 considering whole trials might impede the identification of changes to synergy structure and  
443 activation coefficients. Turpin and colleagues (Turpin et al., 2011), using such an approach, have  
444 previously found that there were no changes in either the structure or activation coefficients during a  
445 fatiguing task. These two main advantages allowed us to analyse the effects of fatigue on synergy  
446 structure and activation coefficients in time, providing a better perspective of synergy adaptations to  
447 fatigue.

## 448 **5 Conclusion**

449 The invariability of synergy structure supports the notion of synergies as a robust mechanism of  
450 motor control. Our study demonstrates a novel approach able to detect the adaptations of synergies to  
451 fatigue by identifying decreases of synergy activation coefficients. Synergies' adaptations to fatigue  
452 seem to be mediated by common neuromuscular regulatory mechanisms coordinating at central and  
453 peripheral levels. If synergy tuning is considered, synergy activation coefficients are likely to be a  
454 valuable approach to assess fatigue under isometric conditions.

## 455 **6 Acknowledgments**

## 456 **7 Author contribution statement**

## Fatigue influences synergy recruitment

457 PO-A and AM contributed to the original concept, design and technical development of the work.  
458 PO-A acquired and analysed the data, and wrote the draft of the work. All authors contributed with  
459 the discussion development. AM, WB and TB contributed with improvement to analysis and data  
460 collection, and revised the draft. AM and PO-A constructed the final version of the manuscript.

### 461 **8 Conflict of interest statement**

462 Authors declare that research was conducted in the absence of any commercial, financial or any other  
463 relationship that could be a potential conflict of interest.

464

### 465 **References**

- 466 Allen, G. M., Gandevia, S. C., and McKenzie, D. K. (1995). Reliability of measurements of muscle  
467 strength and voluntary activation using twitch interpolation. *Muscle Nerve* 18, 593–600.
- 468 Baudry, S., Klass, M., Pasquet, B., and Duchateau, J. (2007). Age-related fatigability of the ankle  
469 dorsiflexor muscles during concentric and eccentric contractions. *Eur. J. Appl. Physiol.* 100,  
470 515–525.
- 471 Berry, M. W., Browne, M., Langville, A. N., Pauca, V. P., and Plemmons, R. J. (2007). Algorithms  
472 and applications for approximate nonnegative matrix factorization. *Comput. Stat. Data Anal.*  
473 52, 155–173. doi:10.1016/j.csda.2006.11.006.
- 474 Bigland-Ritchie, B., Donovan, E. F., and Roussos, C. S. (1981). Conduction velocity and EMG  
475 power spectrum changes in fatigue of sustained maximal efforts. *J. Appl. Physiol.* 51, 1300–  
476 1305.
- 477 Bigland-Ritchie, B., Jones, D. A., and Woods, J. J. (1979). Excitation frequency and muscle fatigue:  
478 Electrical responses during human voluntary and stimulated contractions. *Exp. Neurol.* 64,  
479 414–427. doi:10.1016/0014-4886(79)90280-2.
- 480 Bizzi, E., Cheung, V. C. K., d'Avella, A., Saltiel, P., and Tresch, M. (2008a). Combining modules  
481 for movement. *Brain Res. Rev.* 57, 125–133. doi:10.1016/j.brainresrev.2007.08.004.
- 482 Bizzi, E., Cheung, V. C. K., d'Avella, A., Saltiel, P., and Tresch, M. (2008b). Combining modules  
483 for movement. *Brain Res. Rev.* 57, 125–133. doi:10.1016/j.brainresrev.2007.08.004.
- 484 Borg, G. (1998). *Borg's Perceived Exertion and Pain Scales*. Champaign, IL: Human Kinetics.
- 485 Bülow, P. M., Jørregaard, J., Mehlsen, J., and Danneskiold-Samsøe, B. (1995). The twitch  
486 interpolation technique for study of fatigue of human quadriceps muscle. *J. Neurosci.*  
487 *Methods* 62, 103–109. doi:10.1016/0165-0270(95)00062-3.
- 488 Cheung, V. C. K., d'Avella, A., Tresch, M. C., and Bizzi, E. (2005). Central and sensory  
489 contributions to the activation and organization of muscle synergies during natural motor

## Fatigue influences synergy recruitment

- 490 behaviors. *J. Neurosci. Off. J. Soc. Neurosci.* 25, 6419–6434.  
491 doi:10.1523/JNEUROSCI.4904-04.2005.
- 492 Criswell, E. (2010). *Cram's introduction to surface electromyography*. Jones & Bartlett Publishers.
- 493 d'Avella, A., Portone, A., Fernandez, L., and Lacquaniti, F. (2006). Control of fast-reaching  
494 movements by muscle synergy combinations. *J. Neurosci. Off. J. Soc. Neurosci.* 26, 7791–  
495 7810. doi:10.1523/JNEUROSCI.0830-06.2006.
- 496 d'Avella, A., Saltiel, P., and Bizzi, E. (2003). Combinations of muscle synergies in the construction  
497 of a natural motor behavior. *Nat. Neurosci.* 6, 300–308. doi:10.1038/nn1010.
- 498 De Luca, C. J. (1984). Myoelectrical manifestations of localized muscular fatigue in humans. *Crit.*  
499 *Rev. Biomed. Eng.* 11, 251–279.
- 500 Dideriksen, J. L., Enoka, R. M., and Farina, D. (2011). Neuromuscular adjustments that constrain  
501 submaximal EMG amplitude at task failure of sustained isometric contractions. *J. Appl.*  
502 *Physiol.* 111, 485–494. doi:10.1152/jappphysiol.00186.2011.
- 503 Dimitrova, N. A., and Dimitrov, G. V. (2003). Interpretation of EMG changes with fatigue: facts,  
504 pitfalls, and fallacies. *J. Electromyogr. Kinesiol.* 13, 13–36. doi:10.1016/S1050-  
505 6411(02)00083-4.
- 506 Enoka, R. M., Baudry, S., Rudroff, T., Farina, D., Klass, M., and Duchateau, J. (2011). Unraveling  
507 the neurophysiology of muscle fatigue. *J. Electromyogr. Kinesiol.* 21, 208–219.  
508 doi:10.1016/j.jelekin.2010.10.006.
- 509 Enoka, R. M., and Duchateau, J. (2008). Muscle fatigue: what, why and how it influences muscle  
510 function. *J. Physiol.* 586, 11–23.
- 511 Gandevia, S. C. (2001). Spinal and Supraspinal Factors in Human Muscle Fatigue. *Physiol. Rev.* 81,  
512 1725–1789.
- 513 Gandevia, S. C., Allen, G. M., Butler, J. E., and Taylor, J. L. (1996). Supraspinal factors in human  
514 muscle fatigue: evidence for suboptimal output from the motor cortex. *J. Physiol.* 490, 529–  
515 536.
- 516 Garland, S. J., Garner, S. H., and McComas, A. J. (1988). Reduced voluntary electromyographic  
517 activity after fatiguing stimulation of human muscle. *J. Physiol.* 401, 547–556.  
518 doi:10.1113/jphysiol.1988.sp017178.
- 519 Gerdle, B., Larsson, B., and Karlsson, S. (2000). Criterion validation of surface EMG variables as  
520 fatigue indicators using peak torque: a study of repetitive maximum isokinetic knee  
521 extensions. *J. Electromyogr. Kinesiol.* 10, 225–232. doi:10.1016/S1050-6411(00)00011-0.
- 522 Hayward, L., Wesselmann, U., and Rymer, W. Z. (1991). Effects of muscle fatigue on mechanically  
523 sensitive afferents of slow conduction velocity in the cat triceps surae. *J. Neurophysiol.* 65,  
524 360–370.

## Fatigue influences synergy recruitment

- 525 Hermens, H. J., Freriks, B., Merletti, R., Stegeman, D. F., Blok, J., Rau, G., et al. (1999). *European*  
526 *recommendations for surface ElectroMyoGraphy : results of the SENIAM project*. Enschede:  
527 Roessingh Research and Development.
- 528 Hultman, E., and Sjöholm, H. (1983). Electromyogram, force and relaxation time during and after  
529 continuous electrical stimulation of human skeletal muscle in situ. *J. Physiol.* 339, 33–40.  
530 doi:10.1113/jphysiol.1983.sp014700.
- 531 Kaufman, L., and Rousseeuw, P. (1990). *Finding Groups in Data: An Introduction to Cluster*  
532 *Analysis*. Wiley-Interscience Available at:  
533 <http://www.amazon.ca/exec/obidos/redirect?tag=citeulike09-20&path=ASIN/0471735787>  
534 [Accessed November 23, 2017].
- 535 Kouzaki, M., Shinohara, M., Masani, K., Kanehisa, H., and Fukunaga, T. (2002). Alternate muscle  
536 activity observed between knee extensor synergists during low-level sustained contractions. *J.*  
537 *Appl. Physiol.* 93, 675–684.
- 538 Lee, D. D., and Seung, H. S. (1999). Learning the parts of objects by non-negative matrix  
539 factorization. *Nature* 401, 788–791. doi:10.1038/44565.
- 540 Levenez, M., Kotzamanidis, C., Carpentier, A., and Duchateau, J. (2005). Spinal reflexes and  
541 coactivation of ankle muscles during a submaximal fatiguing contraction. *J. Appl. Physiol.*  
542 99, 1182–1188.
- 543 Macefield, V. G., Gandevia, S. C., Bigland-Ritchie, B., Gorman, R. B., and Burke, D. (1993). The  
544 firing rates of human motoneurons voluntarily activated in the absence of muscle afferent  
545 feedback. *J. Physiol.* 471, 429–443.
- 546 McCrea, D. A. (2001). Spinal circuitry of sensorimotor control of locomotion. *J. Physiol.* 533, 41–  
547 50. doi:10.1111/j.1469-7793.2001.0041b.x.
- 548 McMorland, A. J. C., Runnalls, K. D., and Byblow, W. D. (2015). A Neuroanatomical Framework  
549 for Upper Limb Synergies after Stroke. *Front. Hum. Neurosci.* 9.  
550 doi:10.3389/fnhum.2015.00082.
- 551 Merletti, R., Lo Conte, L. R., and Orizio, C. (1991). Indices of muscle fatigue. *J. Electromyogr.*  
552 *Kinesiol.* 1, 20–33. doi:10.1016/1050-6411(91)90023-X.
- 553 Merton, P. A. (1954). Voluntary strength and fatigue. *J. Physiol.* 123, 553–564.  
554 doi:10.1113/jphysiol.1954.sp005070.
- 555 Park, H.-S., and Jun, C.-H. (2009). A simple and fast algorithm for K-medoids clustering. *Expert*  
556 *Syst. Appl.* 36, 3336–3341. doi:10.1016/j.eswa.2008.01.039.
- 557 Pittsburgh, U. Dragonfly Messaging - The fastest way to connect ad-hoc software modules. Available  
558 at: <http://dragonfly-msg.org/> [Accessed October 25, 2017].
- 559 Roh, J., Rymer, W. Z., and Beer, R. F. (2012). Robustness of muscle synergies underlying three-  
560 dimensional force generation at the hand in healthy humans. *J. Neurophysiol.* 107, 2123–  
561 2142. doi:10.1152/jn.00173.2011.

## Fatigue influences synergy recruitment

- 562 Roh, J., Rymer, W. Z., and Beer, R. F. (2015). Evidence for altered upper extremity muscle synergies  
563 in chronic stroke survivors with mild and moderate impairment. *Front. Hum. Neurosci.* 9.  
564 doi:10.3389/fnhum.2015.00006.
- 565 Smale, K. B., Shourijeh, M. S., and Benoit, D. L. (2016). Use of muscle synergies and wavelet  
566 transforms to identify fatigue during squatting. *J. Electromyogr. Kinesiol.* 28, 158–166.  
567 doi:10.1016/j.jelekin.2016.04.008.
- 568 Steele, K. M., Tresch, M. C., and Perreault, E. J. (2013). The number and choice of muscles impact  
569 the results of muscle synergy analyses. *Front. Comput. Neurosci.* 7.  
570 doi:10.3389/fncom.2013.00105.
- 571 Todd, G., Petersen, N. T., Taylor, J. L., and Gandevia, S. (2003). The effect of a contralateral  
572 contraction on maximal voluntary activation and central fatigue in elbow flexor muscles. *Exp.*  
573 *Brain Res.* 150, 308–313.
- 574 Turpin, N. A., Guével, A., Durand, S., and Hug, F. (2011). Fatigue-related adaptations in muscle  
575 coordination during a cyclic exercise in humans. *J. Exp. Biol.* 214, 3305–3314.  
576 doi:10.1242/jeb.057133.
- 577 Valero-Cuevas, F. J., Venkadesan, M., and Todorov, E. (2009). Structured variability of muscle  
578 activations supports the minimal intervention principle of motor control. *J. Neurophysiol.*  
579 102, 59–68. doi:10.1152/jn.90324.2008.
- 580 Vallbo, A. B. (1974). Afferent Discharge from Human Muscle Spindles in Non-Contracting Muscles.  
581 Steady State Impulse Frequency as a Function of Joint Angle. *Acta Physiol. Scand.* 90, 303–  
582 318. doi:10.1111/j.1748-1716.1974.tb05593.x.
- 583 Vøllestad, N. K. (1997). Measurement of human muscle fatigue. *J. Neurosci. Methods* 74, 219–227.
- 584 Welch, P. D. (1967). The use of fast Fourier transform for the estimation of power spectra: A method  
585 based on time averaging over short, modified periodograms. *IEEE Trans. Audio*  
586 *Electroacoustics* 15, 70–73. doi:10.1109/TAU.1967.1161901.
- 587
